# Supplementary material for: Outcomes and Safety of History-Based Screening for Medication Abortion: A Retrospective Multicenter Cohort Study
Source: PubMed Central journal article supplement (PMC8938895; doi:10.1001/jamainternmed.2022.0217), 2022-03-21
Supplement: jamainternmed-e220217-s001.pdf [file jamainternmed-e220217-s001.pdf]

## Supplemental Online Content

Upadhyay UD, Raymond EG, Koenig LR, et al. Outcomes and safety of history-based screening for medication abortion: a retrospective multicenter cohort study. *JAMA Intern Med*. Published online March 21, 2022. doi:10.1001/jamainternmed.2022.0217

**eTable.** Service delivery characteristics of the participating clinics and study population

This supplemental material has been provided by the authors to give readers additional information about their work.

| <b>eTable. Service delivery characteristics of the participating clinics and study population</b> |             |
|---------------------------------------------------------------------------------------------------|-------------|
|                                                                                                   | <b>N=14</b> |
| <b>Clinic Characteristics</b>                                                                     |             |
| Clinic Type                                                                                       |             |
| Independent abortion clinic                                                                       | 4           |
| Planned Parenthood affiliate                                                                      | 4           |
| University-affiliated or academic clinic                                                          | 4           |
| Online only service                                                                               | 2           |
| Participated in the TelAbortion Study                                                             |             |
| No                                                                                                | 8           |
| Yes                                                                                               | 6           |
| <b>Eligibility</b>                                                                                |             |
| Criteria used to determine eligibility for no-test medication abortion                            |             |
| Patient certain of last menstrual period date                                                     | 14          |
| No recent pelvic pain                                                                             | 12          |
| No recent vaginal bleeding                                                                        | 13          |
| No previous ectopic pregnancy                                                                     | 12          |
| No previous sterilization                                                                         | 10          |
| No IUD in place at or since conception                                                            | 14          |
| No previous pelvic inflammatory disease                                                           | 8           |
| No previous c-section                                                                             | 0           |
| Pregnancy duration limit for no-test medication abortion                                          |             |
| 70 days                                                                                           | 5           |
| 77 days                                                                                           | 9           |
| Clinic policy for offering no-test medication abortion to patients                                |             |
| All eligible patients                                                                             | 12          |
| By provider discretion                                                                            | 2           |
| Routine pre-abortion tests conducted for no-test medication abortion patients                     |             |
| Abdominal Exam                                                                                    | 0           |
| Serum $\beta$ -hCG                                                                                | 0           |
| Hemoglobin or hematocrit                                                                          | 0           |
| COVID-19                                                                                          | 0           |
| <b>Rh Immune Globulin</b>                                                                         |             |
| Does not administer RhIg to any Rh- patients                                                      | 4           |
| RhIg recommended/required for Rh- patients over a certain pregnancy duration                      | 10          |
| <b>Mifepristone and Misoprostol Dispensing</b>                                                    |             |
| Method of mifepristone dispensing                                                                 |             |
| Only in-person                                                                                    | 3           |
| All pills mailed                                                                                  | 2           |
| Offered both in-person and mailing                                                                | 9           |
| Curbside pick-up available (among clinics that offered in-person dispensing)                      |             |
| No                                                                                                | 8           |
| Yes                                                                                               | 4           |
| Method of misoprostol dispensing                                                                  |             |
| Dispensed with mifepristone                                                                       | 12          |
| Prescription filled at pharmacy                                                                   | 1           |

|                                                                  |    |
|------------------------------------------------------------------|----|
| Varied                                                           | 1  |
| Number of misoprostol tablets routinely provided                 |    |
| 8 x 200 $\mu$ g                                                  | 4  |
| Varied by pregnancy duration                                     | 10 |
| <b>Follow-up</b>                                                 |    |
| Earliest scheduled patient interaction in routine follow-up plan |    |
| No scheduled follow-up visit                                     | 1  |
| <7 days                                                          | 11 |
| 1-2 weeks                                                        | 2  |

hCG – human chorionic gonadotropin

Rh – Rhesus

RhIg – Rhesus Immune Globulin

$\mu$ g – micrograms

---
